**Manuscript title:**

Stochastic exits from dormancy give rise to heavy-tailed distributions of descendants in bacterial populations

Erik S. Wright<sup>a</sup> & Kalin H. Vetsigian<sup>b\*</sup>

Department of Biomedical Informatics, University of Pittsburgh, USA<sup>a</sup>.

Department of Bacteriology and Wisconsin Institute for Discovery, University of Wisconsin-Madison, USA<sup>b</sup>.

**Running Head:** High variance in bacterial progeny

**\*Address correspondence to** Kalin Vetsigian, [kalin.vetsigian@wid.wisc.edu](mailto:kalin.vetsigian@wid.wisc.edu)

**Keywords:** genetic drift, effective population size, variance reproductive success, high-resolution lineage tracking, microbial population ecology

The authors declare no conflict of interest.

1 **ABSTRACT**

2 Variance in reproductive success is a major determinant of the degree of genetic drift in a  
3 population. While many plants and animals exhibit high variance in their number of progeny,  
4 far less is known about these distributions for microorganisms. We quantified the distribution  
5 of descendants arising from stochastically germinating *Streptomyces* spores by applying a novel  
6 and generalizable method. The distribution is heavy-tailed, with a few cells effectively “winning  
7 the jackpot” to become a disproportionately large fraction of the population. This not only  
8 decreases the effective population size by many orders of magnitude but can lead to its sub-  
9 linear scaling with the census population size. Furthermore, incorporating the empirically  
10 determined distribution into population genetics simulations reveals allele dynamics that differ  
11 substantially from classical population genetics models with matching effective population size.  
12 These results demonstrate that stochastic exists from dormancy can have a major influence on  
13 evolution in bacterial populations.

## 14 INTRODUCTION

15 Since the dawn of population genetics, it has been clear that the distribution of the number of  
16 offspring per parent is central to developing a quantitative understanding of the evolution of  
17 genetic variants (1-5). The offspring distribution provides a mapping between generations and  
18 directly determines the extent to which genetic drift affects allele frequencies in a population  
19 (6). Specifically, the effective population size, which is often used to quantify genetic drift, is  
20 inversely proportional to the variance of the offspring distribution. In classical models of  
21 population genetics, such as the Wright-Fisher model, the offspring distribution is Poisson  
22 distributed (7, 8). However, for some animals there is high variance in reproductive success,  
23 with a minority of males fathering a large fraction of the children in each generation (9-12).  
24 Such highly-skewed offspring distributions have fundamental implications for how we predict  
25 and interpret fluctuations in allele frequencies (6, 13, 14). These implications include: dramatic  
26 (e.g., six orders of magnitude) discrepancy between census and effective population size (13),  
27 genetic patchiness on small spatial scales despite long-range dispersal (12, 15, 16), and  
28 dramatically altered effectiveness of selection compared with classical population genetics  
29 models (6, 17, 18).

30 In contrast to plants and animals, the offspring distribution is largely unexplored for  
31 microorganisms. One reason for this might be that the offspring distribution is seemingly  
32 simpler for bacteria undergoing binary fission, since each cell can only leave behind 0 (death), 1  
33 (no doublings), or 2 descendants. However, even clonal populations of bacteria display a  
34 distribution of growth rates and lag times, causing them to yield a variable number of offspring  
35 after some time (19-22). In particular, many microorganisms form spores or persister (non-

36 growing) phenotypes to survive unfavorable environments or disperse (19, 23, 24), and exit  
37 from dormancy is often a stochastic process that presumably evolved as a bet hedging strategy  
38 to overcome environmental uncertainty (20, 25).

39       Importantly, it is unclear how stochastic variability in growth rates and lag times affects  
40 genetic drift. One way to study this quantitatively is by examining the distribution of the  
41 number of bacteria arising from a single bacterium after a given amount of time  $\tau$ , where the  
42 time  $\tau$  is substantially longer than the standard doubling time (Fig. 1a). This is a stochastic  
43 quantity which can be described by a probability distribution that we term here the  
44 'distribution of descendants'. In a system with seasonality, for example, one might look at this  
45 distribution after one season. Defined as such, the distribution of descendants is a fundamental  
46 quantity of which little is known for bacteria. Quantifying this distribution and how it varies  
47 across species and environments would likely improve our understanding of genetic drift in  
48 microbial populations and, ultimately, our ability to correctly interpret the genetic variability  
49 observed in sequence data.

50       Here we present a scalable methodology for quantifying the distribution of descendants  
51 in clonal populations. We used a generalizable barcode tagging approach that enabled us to  
52 track descendants from hundreds of sub-populations differing only by a short DNA barcode  
53 inserted in their chromosome. We developed two analysis methods for determining the  
54 distribution of descendants from barcode data, and applied these approaches to soil bacteria  
55 from the genus *Streptomyces*. We focused on *Streptomyces* because they have complicated life-  
56 cycles, and the impact of life-cycle stages on the distribution of descendants is particularly  
57 poorly understood (26). Using the variability between replicates, we show that the distribution

58 of descendants is heavy-tailed – that is some bacteria represent a far greater proportion of the  
59 final population than their initial frequency. Furthermore, using microscope time-lapse imaging,  
60 we demonstrate that the heavy-tailed nature of the distribution of descendants can, in our  
61 case, be largely explained by phenotypic variability in lag time before exponential growth. We  
62 then examine the implications of heavily-skewed distributions of descendants for the  
63 population genetics of microorganisms.

## 64 **RESULTS**

### 65 ***High-throughput measurement of the distribution of descendants***

66 Directly determining the distribution of descendants would require tracking each individual cell  
67 and all of its offspring within a clonal population. Such a brute force strategy is exceedingly  
68 difficult, if not impossible. Therefore, we developed an alternative method to track sub-  
69 populations of cells and infer the shape of the distribution of descendants based on changes in  
70 the relative abundance of sub-populations between replicates (Fig. 1bc). This method involves  
71 tagging bacterial lineages of an otherwise clonal population with a unique 30 base-pair random  
72 sequence inserted at a fixed site on the chromosome (Fig. 1d). A similar technique has been  
73 used previously to tag yeast and *Escherichia* lineages (27, 28). After barcoding, we grew 5  
74 different strains of *Streptomyces* in 8 separate replicate populations starting from 3 different  
75 initial concentrations. *Streptomyces* strains first germinate and then grow as interconnected  
76 filamentous colonies within liquid medium. After 7.5 days of growth, genomic DNA was  
77 extracted and the barcoded region was amplified before sequencing (see Methods). We  
78 observed between 211 and 2,534 unique barcoded lineages per strain across all replicates in

79 the experiment. An example of the data collected for one of the five strains is depicted in Fig.  
80 S1.

81 Since our analysis methods are based on the variability between replicate populations,  
82 they require that the technical variability due to the experimental procedure be far less than  
83 the biological variability. To investigate both of these components of variability, we compared  
84 the frequency distribution determined from technical (PCR) replicates to that originating from  
85 distinct biological replicates. We found that technical replicates had substantially higher  
86 correlation than biological replicates (Fig. S2), confirming that most of the variability is  
87 biological in nature. This allows the shape of the distribution of descendants to be inferred from  
88 fluctuations in the relative abundance of barcodes between biological replicates. However, it is  
89 worth noting that we can only observe the right side of the distribution of descendants,  
90 because the lower detection limit of our method is approximately 1 in  $10^5$  cells based on the  
91 number of initial templates in PCR and sequencing reads. Therefore, we would not observe the  
92 rarest barcodes if they decrease in relative frequency substantially during the course of the  
93 experiment. Nonetheless, we are most interested in the right-tail of the distribution of  
94 descendants because it might include lineages that increase considerably in relative abundance.

95 ***The distribution of descendants is skewed with a heavy tail***

96 Two extremes of the barcode frequency distribution across replicates reveal characteristics of  
97 the distribution of descendants (Fig. 2a). At one end, the abundance of a barcode present at  
98 high frequency is expected to be normally distributed across replicates. This is because, for  
99 abundant barcodes, each barcode represents a large number of initial cells and the final  
100 barcode frequency is a sum of many realizations of the distribution of descendants. Based on

101 the central limit theorem, the variation across replicates will approach normality, so long as the  
102 underlying distribution of descendants has a tail that decays sufficiently fast. We tested  
103 whether the relative frequencies of the 8 replicates belonging to the most abundant barcodes  
104 could be normally distributed using the Shapiro-Wilk test. Each of these barcodes is estimated  
105 to be shared by over 1,000 initial cells per replicate. For 4 out of 9 of these abundant barcodes  
106 the normal distribution was rejected with  $p$ -value  $< 0.02$  (Fig. 2b). Moreover, the fact that we  
107 could repeatedly reject a normal distribution even with a small number of replicates indicates  
108 that the deviations from normality are strong. Thus, this analysis suggests that the underlying  
109 distribution of descendants is heavy-tailed.

110 At the other extreme, as the initial frequency of a barcode approaches a single cell (Fig.  
111 2a), the distribution of final barcode frequencies should approximate the distribution of  
112 descendants. We made the approximation that barcodes appearing in only 1 out of 8 replicates  
113 of a given initial concentration were sufficiently rare to have originated from a single cell. While  
114 we would expect this assumption to be violated in about 10% of cases, the impact of starting  
115 from 2 cells should be on the order of 2-fold. The resulting distribution of barcode frequencies  
116 for these “singletons” is heavy-tailed and appeared broader than a log-normal distribution (Fig.  
117 2c). Surprisingly, for many strains the distribution spanned over three orders of magnitude,  
118 meaning that some barcodes were over-represented by more than 1000-fold that of a typical  
119 barcode starting from an identical initial frequency (Fig. S3).

120 While the singleton distribution provides a model-free estimate of the distribution of  
121 descendants, the downside of this approach is that it only uses a subset of the data, and it  
122 requires the presence of many rare barcodes. For example, one of the barcoded strains, *S*.

123 *S26F9*, had a diversity of barcodes, but only six were at low enough frequency to be observed in  
124 a single replicate (Fig. S3c). Correspondingly, we wondered whether it would be feasible to  
125 develop a more statistically robust procedure for determining the distribution of descendants  
126 by fitting a growth model to all of the data points for each strain.

### 127 ***Stochastic exits from dormancy largely explain the heavy-tail***

128 In order to develop a model for fitting the entire dataset, we first needed to establish the major  
129 sources of growth variability among *Streptomyces* cells in a population. We reasoned that  
130 growth variability would largely result from two sources: differences in lag time before growth  
131 (driven by variability in germination times) or variability in growth rates that is auto-correlated  
132 across divisions. To determine which source dominated growth variability in our experimental  
133 system, we tracked strains under a microscope during their first day of growth on agar medium  
134 containing the same nutrients as the liquid experiment. This resulted in large images (Fig. 3a)  
135 that we aligned between time points to track the growth of each germinated spore (see  
136 Methods). Colony growth was constrained to two dimensions for a long time, which allowed us  
137 to estimate the number of genomes present from the area covered by the colonies. This  
138 method provides a means of directly assessing the distribution of descendants until the time  
139 the colonies intersect and can no longer be distinguished.

140 Three of the five strains mostly completed germination during the course of the  
141 experiment, while two strains germinated too late to adequately track under the microscope.  
142 All three early-germinating strains displayed wide variation in colony size after one day of  
143 growth, with the largest colonies being almost 3-orders of magnitude larger in biomass than the  
144 smallest (Fig. 3b, Fig. S4). This likely underestimated the extent of variability, as large colonies



145 can easily overwhelm smaller colonies so that they cannot be identified at later time points and  
146 because we sampled only hundreds of spores, thus missing rare instances of early germination.  
147 Nevertheless, it was clear that variation in germination times might largely account for the  
148 extreme variability observed in the distribution of descendants. Such lag time variability in  
149 *Streptomyces* has recently been shown to be a phenotypic effect rather than a genotypic effect  
150 (20). After germination, the colonies grew in size deterministically at nearly the same rate (Fig.  
151 3b, Fig. S4). However, it is possible that minute differences in growth rate could compound the  
152 initial variability to make the distribution even wider at time points beyond the duration of  
153 colony tracking. Overall, the result from the time-lapse microscopy revealed that the growth of  
154 our *Streptomyces* strains can be partitioned into stochastic germination and deterministic  
155 growth for the utilized growth media.

156 ***Fitting the entire dataset supports distributions of descendants with fatter than log-normal***  
157 ***tails***

158 Based on the microscope data, we constructed a model in which we partitioned growth into  
159 two phases: an initial lag time drawn from a distribution, followed by exponential growth at a  
160 fixed rate common to all cells. We wished to determine whether a model based on variability in  
161 germination times alone could adequately recapitulate the entire dataset and, if so, determine  
162 the distribution of descendants through parameter fitting without limiting ourselves to the  
163 subset of the data representing rare barcodes. To this end, we simulated the entire  
164 experimental process, starting from sampling an initial population of barcodes, then “growing”  
165 each barcode according to the aforementioned growth model, and sampling the resulting  
166 barcode frequencies for PCR amplification and sequencing steps (Fig. 4a). Since we know the

167 initial census population size from plate counting, the number of initial templates per replicate  
168 based on quantitative PCR, and the number of reads obtained in sequencing, the entire  
169 simulation depends only on the shape of the distribution of lag times relative to a time scale set  
170 by the fixed exponential growth rate. Since the fraction of germinated spores as a function of  
171 time follows a sigmoidal curve (20), we compared two families of commonly used sigmoidal  
172 curves: the generalized logistic function and the cumulative distribution function of the skew  
173 normal distribution, which respectively lead to power-law and log-normal tails for the  
174 distribution of descendants (Fig. S5).

175 Each of the two sigmoidal families was controlled by two parameters,  $r$  and  $\alpha$ , that allow  
176 independent adjustment of the distribution of descendants' width and skew (i.e., left-right  
177 asymmetry) (Fig. 4a). We used the results of 1000 simulations to quantify the fit of each  
178 parameter combination that was tested (Methods). Briefly, the optimality criterion ( $\omega^2$ ) was  
179 based on the sum-of-squared differences between the cumulative distributions of the  
180 simulations and the observed data (the Cramér-von Mises criterion). The value of  $\omega^2$  was  
181 calculated for many different combinations of the two parameters for the two families of  
182 germination curves (Fig. S6), and the lowest value of  $\omega^2$  was selected as the optimal  
183 combination of  $r$  and  $\alpha$ .

184 We found that, for 4 out of 5 species, the generalized logistic function yielded a better  
185 fit (Table S1). The two distributions only had substantially different fits in the cases with the  
186 greatest barcode diversity, suggesting that a large number of barcodes are required to  
187 adequately discern the right-tail of the distribution. Thus, in agreement with observations from

188 singleton barcodes (Fig. 2c), the results from using all of the barcode data further support  
189 distributions of descendants with fatter than lognormal tails.

190 In all cases the simulations appeared to recapitulate the observed variability with high  
191 fidelity (Fig. 4b). This indicated that the simple growth model was sufficient to capture most of  
192 the variability between replicate populations. Impressively, the distribution of descendants  
193 qualitatively matched the observed singleton frequencies for the three simulated strains with  
194 the most singleton barcodes (Fig. 4c), thus providing a validation for our model-based approach  
195 for deducing the distribution of descendants by using all the barcode data. Overall, these  
196 results confirmed that variability in lag time between strains can explain the observed  
197 "jackpots", established a robust procedure for deducing the distribution of descendants, and  
198 indicated that the tail of the distribution of descendants is fatter than lognormal.

### 199 ***Selection is an implausible explanation for the observed distribution of descendants***

200 A potential source of growth variation is the existence of genetic differences within the  
201 population. One genetic basis for variation is that some barcodes have pre-existing mutations  
202 that impart a higher growth rate, resulting in an exponential divergence in relative abundance  
203 over time. However, the method we used to fit the data to the simulation (Fig. 4) is unaffected  
204 by per-barcode selection coefficients because it relies on variability of fates among individuals  
205 with the same barcode. We confirmed this by incorporating selection coefficients into our  
206 stochastic simulation (see Methods) and observed negligible effect on the fitted distribution of  
207 descendants. Another way to uncover differences in inter-barcode selection coefficients is to  
208 look for correlations between the final relative frequencies of rare barcodes. We tested this by  
209 plotting the relative frequency of barcodes that were only present in 2 of 8 replicates (Fig. S7).

210 If jackpots within this set are due to selection, we would expect them to manifest in both  
211 replicates. In contrast, the correlation between replicate barcodes was extremely low  
212 (Pearson's  $r = 0.08$ ), indicating that inter-barcode selection coefficients are not a major source  
213 of the observed variability between replicates.

214         These results do not rule out the possibility that there were rare individuals within a  
215 barcode lineage with new or recently acquired beneficial mutations. Such mutants would likely  
216 have had to arise after the start of the experiment in order to only be present in a minority of  
217 replicates. Given the high number of positively-skewed replicates, it is implausible that so many  
218 mutants of large effect size could occur so rapidly. Furthermore, we estimate that most cells  
219 only doubled about 10-15 times over the course of the experiment, depending on each strain's  
220 initial concentration. Even a large growth rate advantage of 10% would be expected to result in  
221 at most a 3-fold variability in final abundances. Nonetheless, it is well known that mutation is a  
222 major cause of fitness variation in populations, and we cannot rule out the fact that some of  
223 the variance in the distribution of descendants was attributable to genetic differences.

224 ***The heavy-tailed distribution of descendants yields large deviations from classical population***  
225 ***genetics predictions***

226 We next examined the population genetics consequences of the experimentally inferred heavy-  
227 tailed distribution of descendants through population genetics simulations. We focused on *S.*  
228 *G4A3*, for which the optimal fit was given by the generalized logistic germination curve with  $r =$   
229  $0.2$  and  $\alpha = 0.28$  (Fig. 4c, Table S1). We modeled a situation in which we start with  $N$  individuals,  
230 let them grow exponentially to large numbers following a stochastic exit from dormancy, and  
231 then sample  $N$  individuals at random to start the next ecological cycle (Fig 5a, Methods).

232 Through a simulation of this process, we first determined the distribution of  
233 descendants after one ecological cycle, i.e. the distribution,  $v(n)$ , for the number of individuals,  
234  $n$ , descending from one individual after one cycle. Classical population genetics theory states  
235 that the consequences of genetic drift can be captured by a Fisher-Wright model with a  
236 (variance) effective population size  $N_e = N / \text{var}(v)$ . Strikingly, we found that  $N_e$  scales sub-  
237 linearly with  $N$  (Fig. 5b) for the empirically-derived distribution of descendants. That is, doubling  
238 the population size does not double the effective population size. In fact,  $N_e$  exhibited an  
239 apparent power law scaling  $N_e \sim N^{0.41}$ . This counter-intuitive behavior stems from the fact that  
240  $\text{var}(v)$  does not converge to a constant as a function of  $N$  (see Methods) due to the heavy-tailed  
241 nature of the distribution of descendants. Thus, even if individuals grow independently, a sub-  
242 linear scaling of  $N_e$  with  $N$  can emerge for certain distributions of lag times, which leads to a  
243 divergence between  $N$  and  $N_e$  that grows with  $N$ . This result strictly holds only for  $\alpha/r < 2$ . For  
244  $\alpha/r > 2$  or descendant distributions with lognormal tails, significant deviations from  $N_e \sim N$  would  
245 still occur at low  $N$ , but the proportionality between  $N$  and  $N_e$  would eventually be restored for  
246 large enough  $N$  (Fig. S8a).

247 The heavy-tailed distribution of descendants affects the population dynamics beyond  
248 reducing  $N_e$  (29). Through simulations, we determined the fixation probability of beneficial  
249 mutations with different selection coefficients,  $s$ . We observed (Fig. 5c) that as  $s$  increases, the  
250 probability of fixation increases much more rapidly than expected based on the classical  
251 population genetics prediction (for haploid populations) (30), which states:

252 
$$P_{\text{fix}}(s) = \frac{1 - e^{-2sN_e/N}}{1 - e^{-2sN_e}}.$$

253 In fact, the probability of fixation increases faster than linearly and follows an apparent power  
254 law as a function of  $s$  (Fig. S9a). The classical formula with matching  $N_e$  only agrees with the  
255 simulations for very small  $s$  (Fig. S9a). As a control, we verified that this formula agrees well  
256 with simulations of the Fisher-Wright model with matching  $N_e$  across the range of  $s$  values (Fig.  
257 S9b). Therefore, although the role of stochasticity is amplified for heavy-tailed distributions of  
258 descendants, it is partly counterbalanced by an increased efficiency of selection.

259 Finally, we examined whether purely neutral dynamics are also different from the  
260 predictions of a Fisher-Wright model with the same  $N_e$ . To this end, we computed the  
261 distribution of fixation times for a neutral allele starting at 50% abundance (Fig. 5c). We found  
262 that neutral mutations take significantly longer to fix with a heavy-tailed distribution of  
263 descendants. Thus, the population genetic dynamics resulting from the experimentally  
264 determined distribution of descendants is not captured by classical population genetic models  
265 with equivalent variance effective population size. Importantly, these deviations are generic to  
266 heavy-tailed distributions and would persist even for distributions of descendants with  
267 lognormal tails, although the magnitude of the difference would be smaller (Fig. S8b).

## 268 **DISCUSSION**

269 In this study, we developed and applied a scalable procedure for determining the distribution of  
270 descendants arising from a population of bacteria. Surprisingly, the distribution of descendants  
271 was heavy-tailed, resulting in a wide range of relative abundances after only a short time (Fig.  
272 2). This variation was largely explained by differences in lag time before exponential growth  
273 (Fig. 3). We further showed that the observed variability in lag times and the resulting heavy-

274 tailed distribution of descendants have non-trivial consequences for population genetics after  
275 many cycles of growth and dormancy.

276         This work highlights a simple and potentially common mechanism for generating heavy-  
277 tailed distributions of descendants in microbial populations. Such distributions would arise as  
278 long as the exit from dormancy is stochastic and the variation in lag times is large compared to  
279 the doubling time of actively growing cells. It is already well established that many bacteria taxa  
280 have dormancy states that allow them to persist in unfavorable environments, and in fact  
281 natural environments are often numerically dominated by dormant microorganisms (31). While  
282 there are known examples of stochastic exit from dormancy in bacteria (20, 24, 25), it is still  
283 unknown how common such stochasticity is among microorganisms. However, it has been  
284 argued, for example in the context of desert plants (32), that stochastic exit from dormancy is a  
285 bet hedging strategy that increases survival in uncertain environments. Given the generic  
286 nature of this argument, it is likely that stochastic exits from dormancy are common across the  
287 tree of life. We therefore expect that the findings described here will be relevant to many  
288 microbial populations, and will stimulate further work on stochastic germination.

289         Quantification of this stochasticity is important not only as a means of characterizing bet  
290 hedging strategies but also for how we predict and interpret changes in allele frequencies. The  
291 functional form of germination stochasticity determines how heavy-tailed the distributions of  
292 descendants are. In particular, an exponential rise of the germination curve (Fig. 4a) can lead to  
293 fat-tailed, power-law like distributions. In contrast, a Gaussian distribution of germination times  
294 would lead to log-normal distributions, which are less extreme. Heavier tails result in greater  
295 deviations from classical population genetics predictions. One intuitive way to think about this

296 is that the variance of a distribution no longer summarizes it well if the distribution is heavy-  
297 tailed. Thus, variance-based adjustments of the effective population size are insufficient to  
298 capture the allele dynamics. In this way, luck might play a far greater role in evolution than  
299 generally considered by classical population genetics models.

300         The heavy-tailed nature of the distribution of descendants is anticipated to have several  
301 effects on bacterial populations. First, extreme stochastic variability can decrease the effective  
302 population size dramatically below the census population size (13), even when the census size  
303 is measured at population bottlenecks within ecological cycles. Moreover, our experimental  
304 results supported a population genetics model in which the discrepancy between census and  
305 effective population sizes increases with the number of individuals and, therefore, becomes  
306 more important for large systems. Such processes can greatly amplify the effects of genetic  
307 drift and lead to faster elimination of genetic diversity, larger fluctuations of allele frequencies,  
308 and an increased lower-bound at which weak selective pressure can effectively act. In  
309 particular, amplified genetic drift may influence microbial population dynamics on timescales  
310 that are important to commercial biotechnologies or bacterial infections. Second, classical  
311 population genetics models with matching variance effective population size do not adequately  
312 represent dynamics in a population with a heavy-tailed distribution of descendants. We showed  
313 that the probability of fixation of beneficial mutations increases faster than linearly with the  
314 selection coefficient and that fixation times of neutral alleles are longer than expected given  
315 the effective population size. Third, since many infections are caused by a small initial number  
316 of cells or viruses, wide distributions of descendants may greatly influence the early burden on  
317 the host and partly explain the variability in symptoms observed between patients with the



318 same infection. Finally, our results offer support for the notion that true fitness, that is the long-  
319 term propensity to have more descendants, is difficult to measure (33). Even the largest sub-  
320 populations in our experiments exhibited variability in their relative abundance between  
321 replicates due to jackpots. Owing to insufficient replication or low initial population size, this  
322 variability could easily be interpreted as a long-term heritable fitness difference when  
323 potentially none is present.

324 While, to our knowledge, this is the first measurement of a distribution of descendants  
325 for bacteria, it is known that viruses also exhibit large variation in the number of progeny  
326 generated from each infected cell. For example, human cells can differ by up to 300-fold in the  
327 number of released viruses depending on the stage of the cell cycle in which the infection  
328 occurs (34, 35). The methodology employed here for tracking *Streptomyces* could be extended  
329 to study the distributions of descendants for other species and environments. It would be  
330 particularly interesting to determine the distribution of descendants of bacterial populations in  
331 their natural environment or as part of the human microbiome, where additional complexities  
332 might further broaden the distribution relative to the homogeneous environment explored in  
333 this study.

## 334 **MATERIALS AND METHODS**

### 335 ***Construction of barcoded strains of Streptomyces***

336 Oligonucleotides 5'-GATCCACACTCTTCCCTACACGACGCTCTCCGATCT-3' and 5'-S20-N30-  
337 AGATCGGAAGAGCGTCGTGTAGGGAAAGAGTGTG/3Phos/ were purchased from Integrated DNA  
338 Technologies. The latter oligonucleotide is different for each strain library and contains a  
339 unique 20-nucleotide strain barcode (S20), a stretch of 30 random nucleotides that form the set

340 of lineage barcodes (*N30*), and a 3'-phosphate modification. To permit robust identification of a  
341 strain in the presence of sequencing errors, the *S20* sequences were designed using EDITTAG  
342 (36). The 34-nucleotide complementary region of the two oligonucleotides were annealed,  
343 made double stranded using Klenow Polymerase (Promega), and then modified using T4  
344 Polynucleotide Kinase (New England Biolabs), which removes the 3'-phosphate and adds 5'-  
345 phosphates. Subsequently, this DNA insert was ligated into plasmid pSRKV004 cut with BamHI  
346 and EcoRV (New England BioLabs). The plasmid pSRKV004 is a derivative of the integrating  
347 plasmid pSET152 (37) in which the orientation of EcoRV and BamHI sites in the multiple cloning  
348 site is reversed.

349 To reduce the background of pSRKV004 without inserts after ligation, the ligation  
350 mixture was digested with EcoRV and NotI (New England BioLabs) and then transformed into *E.*  
351 *coli* 10G ELITE cells (Lucigen) via electroporation. Transformants were selected on lysogeny  
352 broth (LB) plates with 50 µg/ml Apramycin, and the pool of transformants underwent plasmid  
353 preparation (miniprep) using a commercial kit (Promega). The miniprep was again digested with  
354 EcoRV and NotI and the resulting library was introduced into the conjugation helper strain  
355 ET12567-pUZ8002 (37) via chemical transformation. Transformants were selected on LB + 15  
356 µg/ml Chloramphenicol + 50 µg/ml Kanamycin and 50 µg/ml Apramycin plates, pooled, and  
357 grown in liquid LB containing 15 µg/ml Chloramphenicol, 50 µg/ml Kanamycin and 50 µg/ml  
358 Apramycin for 2-3 hours in a 37°C shaker.

359 This *E. coli* culture was used for conjugation into the desired *Streptomyces* strain  
360 according to a standard protocol (37). Briefly, the transformed conjugation helper strain was  
361 mixed with *Streptomyces* spores, the bacterial mix was grown on mannitol-salt (MS) agar for 16

362 hours and then overlaid with Apramycin (100 µg/ml) and Nalidixic acid (50 µg/ml). Strains  
363 successfully undergoing conjugation integrate the plasmid at a phage attachment site in their  
364 genomic DNA (38). Barcoded libraries were prepared by scraping spores from exconjugants and  
365 selecting against *E. coli* carryover by propagating the spores on *Streptomyces* Isolation Medium  
366 (37) supplemented with 50 µg/ml Nalidixic acid and 100 µg/ml Apramycin for two growth  
367 cycles.

### 368 ***Strains and growth conditions***

369 Five barcoded *Streptomyces* strains were chosen based on having more than 100 distinct  
370 barcodes per strain. These five strains were *S. coelicolor*, *S. albus J1074*, *S. G4A3* (39), *S. S26F9*  
371 (40), and *S. venezuelae*. Across all experiments, we observed a total of 283, 1611, 2534, 211,  
372 and 419 unique *N30* barcodes, respectively, for the 5 strains. Full concentration spore stocks  
373 were diluted 10-fold and 100-fold to generate three initial concentrations, and aliquoted into 8  
374 replicates per concentration, each containing a single strain (120 total populations). Each  
375 replicate (30 µl) was used to inoculate 1 ml of 1/10<sup>th</sup> concentration ISP2 liquid (10 g Malt  
376 extract, 4 g Yeast extract, and 4 g Dextrose per 1 L) in a sterile 1.5 ml polystyrene tube  
377 (Evergreen Scientific). A small hole was made in the cap of each tube to allow air flow. Tubes  
378 were incubated for 7.5 days at 28°C while shaking at 200 rpm.

### 379 ***DNA extraction and sequencing***

380 After growth, strains were centrifuged at 2000 rpm for 10 minutes to pellet the cells. A 750 µl  
381 volume of supernatant was removed, leaving about 150 µl remaining. Note that about 10% of  
382 the original volume was lost to evaporation during growth. The remaining volume containing  
383 mycelium was sonicated at 100% amplitude for 3 minutes using a Model 505 Sonicator with

384 Cup Horn (QSonica) while the samples were completely enclosed. After sonication, the samples  
385 were centrifuged, and the supernatant containing DNA was used as template for PCR  
386 amplification.

387 PCR primers (Table S2) were designed with unique 8-nucleotide i5 and i7 index  
388 sequences and Illumina adapters. The random barcode (*N30*) sequence occurs at the start of  
389 the sequencing read to assist with cluster detection on the Illumina platform. Since strains  
390 could be distinguished by their sequence specific barcode (*S20*), we amplified each replicate  
391 using a unique dual-index combination, but used the same set of combinations for all 5 strains.  
392 Hence, the *S20* region effectively acted as a third index sequence that allowed the 5 strains  
393 sharing dual-index primers to be correctly de-multiplexed. This permitted all 24 samples per  
394 strain to be multiplexed without needing to have some samples only separated by a single i5 or  
395 i7 index. All strains were amplified separately before pooling, requiring a total of 120 PCR  
396 reactions (5 strains with 24 replicates each). In addition, we performed two more technical  
397 (PCR) replicates of one sample belonging to each strain.

398 Extracted DNA was amplified using a qPCR reaction consisting of a 2 min denaturation  
399 step at 95°C, followed by 40 cycles of 20 sec at 98°C, 15 sec at 67°C, and 15 sec at 80°C. Each  
400 well contained 10 µL of iQ Supermix (Bio-Rad), 1.6 µL of 10 µM left primer, 1.6 µL of 10 µM  
401 right primer, 4 µL of DNA template, and 2.8 µL of reagent grade H<sub>2</sub>O per sample. A standard  
402 curve of pure template DNA was used to estimate the initial DNA copy number per sample. The  
403 resulting amplicons were pooled by sample and purified using the Wizard SV-Gel and PCR  
404 Cleanup System (Promega). Samples were sequenced by the UW-Madison Biotechnology

405 Center on an Illumina Hi-Seq 2500 in rapid mode. Sequences were deposited into the Short  
406 Read Archive (SRA) repository under accession number PRJNA353868.

#### 407 ***DNA sequence analysis***

408 Using the R (41) package DECIPHER (42), DNA sequencing reads were filtered at a maximum  
409 average error of 0.1% (Q30) to lessen the degree of cross-talk between dual-indexed samples  
410 (43). Sequences were assigned to the appropriate strain by exact matching the *S20*, and the  
411 nearest barcode by clustering *N30* sequences within an edit distance of 5. To completely  
412 eliminate any remaining cross-talk, we subtracted 0.01% + 5 reads from the count of every  
413 barcode by sample. The remaining reads were normalized by dividing by the total number of  
414 reads per sample. The final result of this process was a matrix of read counts for each unique  
415 barcode across every sample by strain (Fig. S1).

#### 416 ***Time-lapse imaging of the initial growth***

417 To simultaneously track the growth of many *Streptomyces* colonies, we inoculated spores onto  
418 a device developed as part of another study (20). Each of the five strains were added to a  
419 separate well containing 90  $\mu$ L of 1/10<sup>th</sup> ISP2 with 1.25% purified agar (Sigma-Aldrich). The  
420 surface of each well was imaged for 48 hours using a Nikon Eclipse Ti microscope with a 20x  
421 phase contrast lens. Time points were collected every half hour across a 15 x 15 grid with 20%  
422 overlap, and stitched together with Nikon NIS Elements software to construct a large high-  
423 resolution image.

424 Images were processed using in-house Matlab scripts. First, 25% sized images were  
425 aligned between time-points by identifying shared features using the computer vision toolbox.  
426 Regions of the image with remaining mis-alignment were fixed by local image registration.

427 These transformations were then scaled to larger (50% sized) images used for further analysis.  
428 Growing colonies were detected by comparing the difference between subsequent time points,  
429 and area was determined through thresholding the image since mycelium are darker than the  
430 background. Tracking was terminated at the time point before colonies intersected. Manual  
431 validation was applied to remove artifacts that were incorrectly identified by the algorithm as  
432 mycelium. Finally, growth curves were removed with extreme jumps between time-points or  
433 decreases in colony size, which were characteristic of localized failures in thresholding.

#### 434 ***Complete simulations with different distributions of lag times***

435 We performed comprehensive simulations in order to determine whether the experimental  
436 results can be explained solely based on a variability in lag times and deduce the distributions  
437 of descendants that best explain the data. We accomplished this by simulating the growth of  
438 barcoded lineages under different distributions of descendants and comparing the resulting  
439 distribution of barcodes to the observed distribution of barcodes across the 8 replicates per  
440 strain at a given concentration. First, a background barcode frequency distribution was  
441 generated by averaging the relative barcode frequency distributions across all 8 replicates. This  
442 distribution is reasonably well-approximated by an exponential distribution, but is truncated  
443 because very rare barcodes are not observed. We supplemented these rare barcodes by  
444 extrapolating the exponential distribution and adding back “virtual” barcodes at less than the  
445 10<sup>th</sup> percentile of relative frequency. Since these barcodes are extremely rare, they collectively  
446 have minimal effect on the relative frequencies of the other barcodes.

447 The simulation begins by sampling the initial number of individuals ( $n$ ) from a Poisson  
448 distribution. For each parameter combination, we first optimized the initial (census) population

449 size ( $n$ ) to yield the same number of unique barcodes that were observed in the real data. The  
450 barcodes assigned to these individuals are drawn from the pool of barcodes in accordance with  
451 the aforementioned background barcode frequency distribution. We then assume that an  
452 individual  $i$  starts growing exponentially with growth rate  $r$ , after a stochastic lag time  $t_i$ :

$$453 \quad x_i = e^{r(1+s_i)(T-t_i)},$$

454 where  $x_i$  is the number of descendants of  $i$ ,  $s_i$  is a selection coefficient (assumed to be barcode  
455 specific), and  $T$  is the time when exponential growth is terminated by the experimenter or  
456 exhaustion of resources. We are only interested in the distribution of relative frequencies:

$$457 \quad \hat{x}_i = \frac{x_i}{\sum x_i} = \frac{e^{-r(1+s_i)t_i}}{\sum e^{-r(1+s_i)t_i'}}$$

458 since we only experimentally determine relative barcode frequencies. Notice that  $\hat{x}_i$  is  
459 independent of  $T$ , indicating that  $T$  is irrelevant as long as it is large enough (i.e.,  $T > t_i$ ). We  
460 further assume that  $t_i$ 's are independent and identically distributed random variables,  
461 described by the cumulative distribution function (CDF):

$$462 \quad CDF(t) = (1 + e^{-t})^{-\alpha}.$$

463 And  $\alpha > 0$  is a parameter controlling the skew of the distribution. The effect of varying  $\alpha$  on  
464 germination times is shown in Fig. S5. This model was chosen to reflect the observation that  
465 germination delays largely explain the observed variability in the number of descendants (Fig.  
466 3). We compared this distribution of  $t_i$ 's to one drawn from a skew normal distribution with  
467 shape ( $\alpha$ ) controlling the skewness of the distribution (44). Note that the other (location and  
468 scale) parameters defining a skew normal are irrelevant because the simulation only considers  
469 the relative, rather than absolute, lag times.

470           After the relative barcode frequencies are calculated, the simulation subsamples the  
471 distribution in accordance with the predicted number of initial templates in qPCR followed by  
472 the observed number of sequencing reads. To better reflect the real data, these two steps are  
473 performed on a per-replicate basis. Thus, there are only two free parameters in the simulation,  
474 one proportional to the fixed *growth rate* ( $r$ ), and a second controlling the *skew* of "jackpots"  
475 ( $\alpha$ ). We performed a sweep across a range of parameter combinations to find the optimum  
476 based on the outcome of 1000 replica simulations per combination. Spacing for the search grid  
477 was chosen such that parameter combinations differed by close to the amount of variability  
478 observed between replicate simulations near the optimum (Fig. S6). Accordingly, further  
479 optimization of the parameter values would largely be due to noise because of stochasticity  
480 among the 1000 replicates.

481           To define an optimality criterion, we split the simulation results (Fig. 4b) into successive  
482 bins by median barcode frequency, with 10 bins that were evenly spaced in log-space per order  
483 of magnitude. For each bin, we then compared the sum-of-squared differences ( $\omega^2$ ) between  
484 the cumulative frequency distributions of the real data and that of the combined results of the  
485 1000 simulations. The parameters yielding the minimal  $\omega^2$  were considered optimal, although  
486 oftentimes nearby parameters yielded similar values of  $\omega^2$  due to the density of the search grid  
487 (Fig. S6). We tested whether a distribution could be rejected by comparing  $\omega^2$  of the real data  
488 to that of the 1000 simulations tested against one another through leave-one-out. That is, for  
489 each simulation we calculated  $\omega^2$  against the rest of the simulations after leaving it out of the  
490 dataset. The reported p-value (Table S1) represents the fraction of simulations with at least as  
491 extreme of an  $\omega^2$  as the real data.



492 ***Modeling the population genetics consequences of the distribution of descendants***

493 The population genetics simulation consists of discrete time steps. Each time step captures the  
494 dynamics over one ecological cycle. In the beginning of each ecological cycle,  $N$  random  
495 variables  $t_i$  are drawn from a lag time distribution as described in the previous section, and the  
496 corresponding relative abundances of descendants are computed as  $\hat{x}_i = \frac{\tilde{x}_i}{\sum \tilde{x}_i}$ , where  
497  $\tilde{x}_i = e^{-rt_i}$ . For models with selection we set  $\hat{x}_i \rightarrow (1 + s_i)\hat{x}_i$ , and normalized the sum to 1. To  
498 complete the cycle,  $N$  random individuals are selected from the multinomial distribution  
499 specified by  $\hat{x}_i$  to start the next cycle.

500 To find the variance effective population size,  $N_e$ , we computationally determined the  
501 distribution of descendants,  $v$ , after a full ecological cycle, that is the discrete probability  
502 distribution for the number of descendants from one individual after one ecological cycle. The  
503 mean of  $v$  is 1. We then set  $N_e = N / \text{var}(v)$  (29).

504 All simulations were performed with parameters  $r = 0.2$  and  $\alpha = 0.28$ . For these  
505 parameters, the random variable  $\tilde{x} = e^{-rt}$  (with  $t$  distributed as above) has no finite variance.  
506 In fact, for large  $\tilde{x}$ , we have probability density:

507 
$$P(\tilde{x}) \sim \frac{1}{\tilde{x}^{1+\alpha/r}},$$

508 which is of Pareto form with  $\alpha/r = 1.4 < 2$ . Because of the infinite variance of  $\tilde{x}$ ,  $\text{var}(\hat{x})$   
509 and  $\text{var}(v)$  depend on  $N$  and do not converge to a constant as  $N \rightarrow \infty$ . This leads to the sub-  
510 linear dependence of  $N_e$  on  $N$ , which appears to be a power-law.

511

512

513 **FUNDING INFORMATION**

514 This work was supported by the Simons Foundation, Targeted Grant in the Mathematical  
515 Modeling of Living Systems Award 342039, the National Science Foundation Grant DEB  
516 1457518, and the National Institute of Food and Agriculture, US Department of Agriculture,  
517 Hatch project 1006261. The funders had no role in study design, data collection and  
518 interpretation, or the decision to submit the work for publication.

519 **ACKNOWLEDGEMENTS**

520 We thank Sri Ram for constructing the barcoded strain libraries used in this work, Ye Xu for help  
521 with microscopy experiments, the UW Biotechnology Center DNA Sequencing Facility for  
522 performing the Illumina sequencing associated with this study, and the UW-Madison Center for  
523 High Throughput Computing (CHTC) for providing compute resources. We are grateful for  
524 feedback from David Baum, Anthony Ives, and Laurence Loewe during preparation of the  
525 manuscript.

526 **AUTHOR CONTRIBUTIONS**

527 EW performed the experiments. EW and KV designed the study, analyzed the data, performed  
528 the simulations, and wrote the manuscript.

529 **COMPETING INTERESTS**

530 The authors declare that they have no competing financial or non-financial interests.

531 **REFERENCES**

- 532 1. **Wright S.** 1931. Evolution in Mendelian Populations. *Genetics* **16**:97–159.
- 533 2. **Haldane J.** 1932. A mathematical theory of natural and artificial selection. Part IX. Rapid  
534 selection. *Proceedings of the Cambridge Philosophical Society*.
- 535 3. **Fisher RA.** 1958. *The Genetical Theory of Natural Selection*, 2nd ed. Dover, New York.
- 536 4. **Kimura M.** 1994. *Population Genetics, Molecular Evolution, and the Neutral Theory:*  
537 *Selected Papers*. University of Chicago Press, Chicago.
- 538 5. **Gillespie JH.** 1974. Natural selection for within-generation variance in offspring number.  
539 *Genetics* **76**:601–606.
- 540 6. **Der R, Epstein C, Plotkin JB.** 2012. Dynamics of Neutral and Selected Alleles When the  
541 Offspring Distribution Is Skewed. *Genetics* **191**:1331–1344.
- 542 7. **Charlesworth B.** 2009. Fundamental concepts in genetics: Effective population size and  
543 patterns of molecular evolution and variation. *Nat Rev Genet* **10**:195–205.
- 544 8. **Schierup MH, Wiuf C.** 2010. The Coalescent of Bacterial Populations, pp. 3–18. *In*  
545 Robinson, DA, Falush, D, Feil, EJ (eds.), *Bacterial Population Genetics in Infectious*  
546 *Disease*. John Wiley & Sons, Inc.
- 547 9. **Araki H, Waples RS, Ardren WR, Cooper B, Blouin MS.** 2007. Effective population size of  
548 steelhead trout: influence of variance in reproductive success, hatchery programs, and  
549 genetic compensation between life-history forms. *Molecular Ecology* **16**:953–966.
- 550 10. **Lallias D, Taris N, Boudry P, Bonhomme F, Lapègue S.** 2010. Variance in the reproductive  
551 success of flat oyster *Ostrea edulis* L. assessed by parentage analyses in natural and  
552 experimental conditions. *Genet Res* **92**:175–187.
- 553 11. **Hedgecock D, Pudovkin AI.** 2011. Sweepstakes reproductive success in highly fecund  
554 marine fish and shellfish: a review and commentary. *Bulletin of Marine Science*.
- 555 12. **Hedgecock D.** 1994. Does variance in reproductive success limit effective population  
556 sizes of marine organisms. *Genetics and evolution of aquatic organisms*.
- 557 13. **Hedrick P.** 2005. Large variance in reproductive success and the  $N_e/N$  ratio. *Evolution*  
558 **59**:1596–1599.
- 559 14. **Hoban SM, Mezzavilla M, Gaggiotti OE, Benazzo A, van Oosterhout C, Bertorelle G.**  
560 2013. High variance in reproductive success generates a false signature of a genetic  
561 bottleneck in populations of constant size: a simulation study. *BMC Bioinformatics*  
562 **14**:309.

- 563 15. **Broquet T, Viard F, Yearsley JM.** 2013. Genetic drift and collective dispersal can result in  
564 chaotic genetic patchiness. *Evolution* **67**:1660–1675.
- 565 16. **Selkoe KA, Gaggiotti OE, ToBo Laboratory, Bowen BW, Toonen RJ.** 2014. Emergent  
566 patterns of population genetic structure for a coral reef community. *Molecular Ecology*  
567 **23**:3064–3079.
- 568 17. **Chang H-H, Moss EL, Park DJ, Ndiaye D, Mboup S, Volkman SK, Sabeti PC, Wirth DF,**  
569 **Neafsey DE, Hartl DL.** 2013. Malaria life cycle intensifies both natural selection and  
570 random genetic drift. *Proc Natl Acad Sci USA* **110**:20129–20134.
- 571 18. **Tellier A, Lemaire C.** 2014. Coalescence 2.0: a multiple branching of recent theoretical  
572 developments and their applications. *Molecular Ecology* **23**:2637–2652.
- 573 19. **Fridman O, Goldberg A, Ronin I, Shores N, Balaban NQ.** 2014. Optimization of lag time  
574 underlies antibiotic tolerance in evolved bacterial populations. *Nature* **513**:418–421.
- 575 20. **Xu Y, Vetsigian K.** 2017. Phenotypic variability and community interactions of  
576 germinating *Streptomyces* spores. *Scientific Reports* **7**:699.
- 577 21. **Labhsetwar P, Cole JA, Roberts E, Price ND, Luthey-Schulten ZA.** 2013. Heterogeneity in  
578 protein expression induces metabolic variability in a modeled *Escherichia coli* population.  
579 *Proc Natl Acad Sci USA* **110**:14006–14011.
- 580 22. **Wang P, Robert L, Pelletier J, Dang WL, Taddei F, Wright A, Jun S.** 2010. Robust Growth  
581 of *Escherichia coli*. *CURBIO* 1–15.
- 582 23. **Dworkin J, Shah IM.** 2010. Exit from dormancy in microbial organisms. *Nature Publishing*  
583 *Group* **8**:890–896.
- 584 24. **Balaban NQ.** 2004. Bacterial Persistence as a Phenotypic Switch. *Science* **305**:1622–1625.
- 585 25. **Sturm A, Dworkin J.** 2015. Phenotypic Diversity as a Mechanism to Exit Cellular  
586 Dormancy. *Curr Biol* **25**:2272–2277.
- 587 26. **Bobek J, Šmídová K, Čihák M.** 2017. A Waking Review: Old and Novel Insights into the  
588 Spore Germination in *Streptomyces*. *Front Microbiol* **8**:2205.
- 589 27. **Levy SF, Blundell JR, Venkataram S, Petrov DA, Fisher DS, Sherlock G.** 2015. Quantitative  
590 evolutionary dynamics using high-resolution lineage tracking. *Nature* **519**:181–186.
- 591 28. **Cottinet D, Condamine F, Bremond N, Griffiths AD, Rainey PB, de Visser JAGM, Baudry**  
592 **J, Bibette J.** 2016. Lineage Tracking for Probing Heritable Phenotypes at Single-Cell  
593 Resolution. *PLoS ONE* **11**:e0152395.
- 594 29. **Der R, Epstein CL, Plotkin JB.** 2011. Generalized population models and the nature of

- 595 genetic drift. *Theor Popul Biol* **80**:80–99.
- 596 30. **Kimura M.** 1962. On the probability of fixation of mutant genes in a population. *Genetics*  
597 **47**:713–719.
- 598 31. **Lennon JT, Jones SE.** 2011. Microbial seed banks: the ecological and evolutionary  
599 implications of dormancy. *Nature Publishing Group* **9**:119–130.
- 600 32. **Gremer JR, Venable DL.** 2014. Bet hedging in desert winter annual plants: optimal  
601 germination strategies in a variable environment. *Ecology Letters* **17**:380–387.
- 602 33. **Mills SK, Beatty JH.** 1979. The propensity interpretation of fitness. *Philosophy of Science*  
603 **46**:263–286.
- 604 34. **Zhu Y, Yongky A, Yin J.** 2009. Growth of an RNA virus in single cells reveals a broad  
605 fitness distribution. *Virology* **385**:39–46.
- 606 35. **Timm A, Yin J.** 2012. Kinetics of virus production from single cells. *Virology* **424**:11–17.
- 607 36. **Faircloth BC, Glenn TC.** 2012. Not All Sequence Tags Are Created Equal: Designing and  
608 Validating Sequence Identification Tags Robust to Indels. *PLoS ONE* **7**:e42543.
- 609 37. **Hopwood DA, Kieser T, Bibb MJ, Buttner MJ, Chater KF.** 2000. *Practical Streptomyces*  
610 genetics. The John Innes Foundation.
- 611 38. **Sun J, Kelemen GH, Fernández-Abalos JM, Bibb MJ.** 1999. Green fluorescent protein as a  
612 reporter for spatial and temporal gene expression in *Streptomyces coelicolor A3(2)*.  
613 *Microbiology (Reading, Engl)* **145 ( Pt 9)**:2221–2227.
- 614 39. **Vetsigian K, Jajoo R, Kishony R.** 2011. Structure and Evolution of *Streptomyces*  
615 Interaction Networks in Soil and In Silico. *Plos Biol* **9**:e1001184.
- 616 40. **Wright E, Vetsigian K.** 2016. Inhibitory interactions promote frequent bistability among  
617 competing bacteria. *Nature Communications* **7**:11274.
- 618 41. **R Core Team.** 2017. *R: A Language and Environment for Statistical Computing*, 3rd ed. R  
619 Foundation for Statistical Computing, Vienna, Austria.
- 620 42. **Wright ES.** 2016. Using DECIPHER v2.0 to Analyze Big Biological Sequence Data in R. *The*  
621 *R Journal* **8**:352–359.
- 622 43. **Wright ES, Vetsigian KH.** 2016. Quality filtering of Illumina index reads mitigates sample  
623 cross-talk. *BMC Genomics* **17**:1–7.
- 624 44. **Azzalini A.** 1985. A Class of Distributions Which Includes the Normal Ones. *Scandinavian*  
625 *Journal of Statistics* **12**:171–178.

626 FIGURES

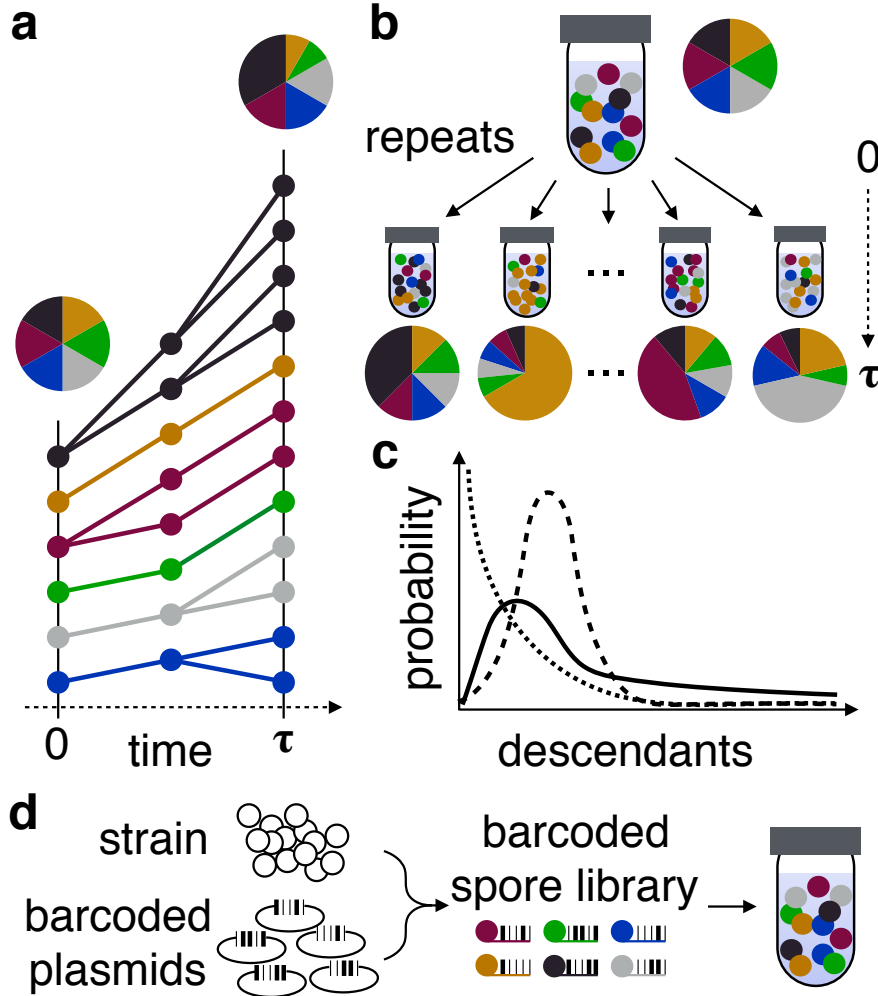

628 **Figure 1. Measurement of the distribution of descendants arising from a population.** **a**, Clonal  
629 cells, represented by colored circles, are grown for a period of time ( $\tau$ ) before their relative  
630 abundances are measured. **b**, The variability in the proportion of descendants between  
631 replicate populations of cells is used to determine the distribution of descendants. **c**, The  
632 distribution of descendants may take on a variety of shapes that have different rates of  
633 converging to zero. A heavy-tailed distribution (solid line) would result in "jackpots" where  
634 individuals have much greater reproductive output than expected based on their initial  
635 frequency. **d**, In order to track lineages, we constructed a barcoded library of *Streptomyces*  
636 where each spore has a unique 30 base-pair lineage-specific sequence integrated into its  
637 chromosome.

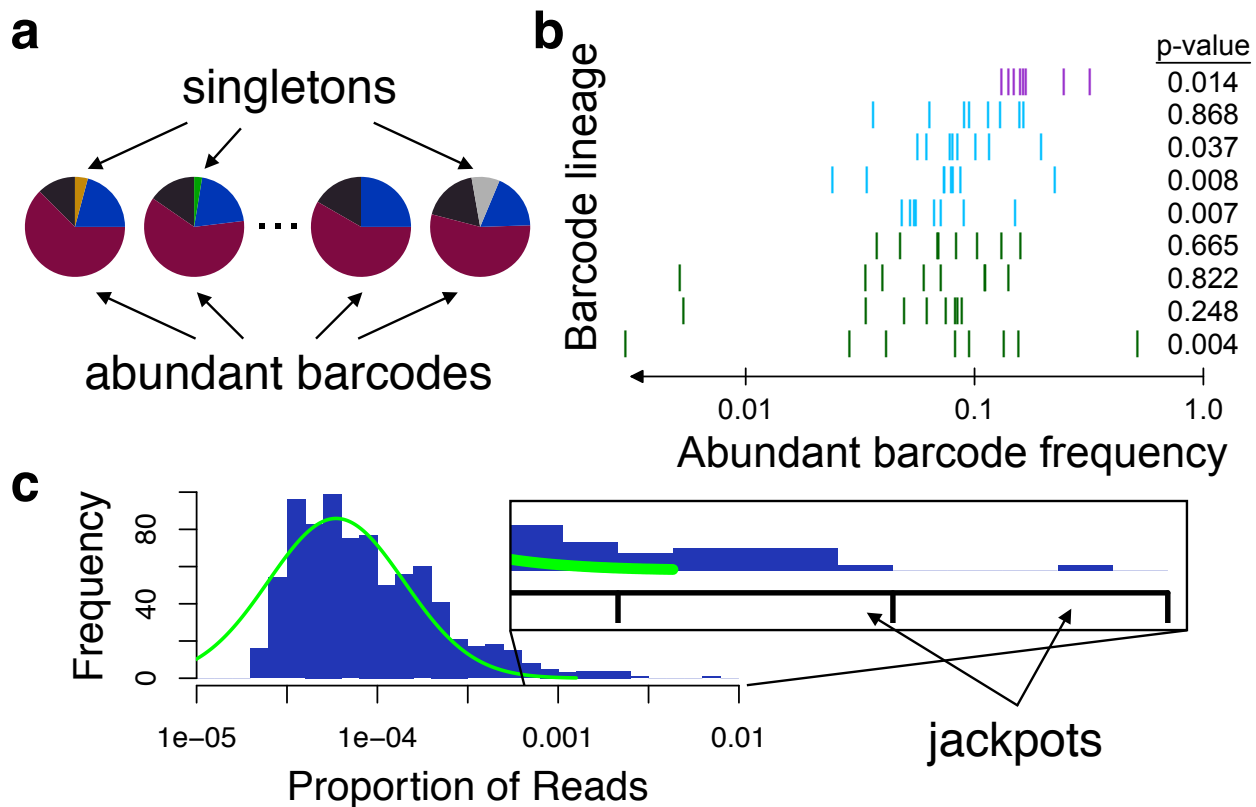

638

639 **Figure 2. Inferring the distribution of descendants from abundant and rare barcodes. a,**  
640 Barcodes at the two extremes of relative abundance reflect the shape of the distribution of  
641 descendants. **b,** Abundant barcodes, those shared by more than 1000 cells in the initial  
642 population, are expected to converge to a normal distribution due to the central limit theorem.  
643 However, many of the most abundant barcodes were not normally distributed across  
644 replicates, based to their p-values (at right) in the Shapiro-Wilk test. Instead, the abundant  
645 barcodes originating from three different strains (colors) were widely scattered in terms of their  
646 final proportion of the population (x-axis). **c,** The singletons, those barcodes occurring in only 1  
647 out of 8 replicates, approximate the shape of the distribution of descendants since they likely  
648 started from single cells. For the strain with the most singletons, *Streptomyces G4A3* (808  
649 singletons), we observed that their relative abundances at the end of the experiment were  
650 more heavy-tailed than a fitted log normal distribution (green curve). The outlying “jackpots”  
651 represent cells that grew to a far higher abundance than the median abundance of singletons,  
652 in many case by more than 100-fold. Note that the left-side of the distribution is likely  
653 truncated because it contains barcodes that fall below the lower detection limit of our method.



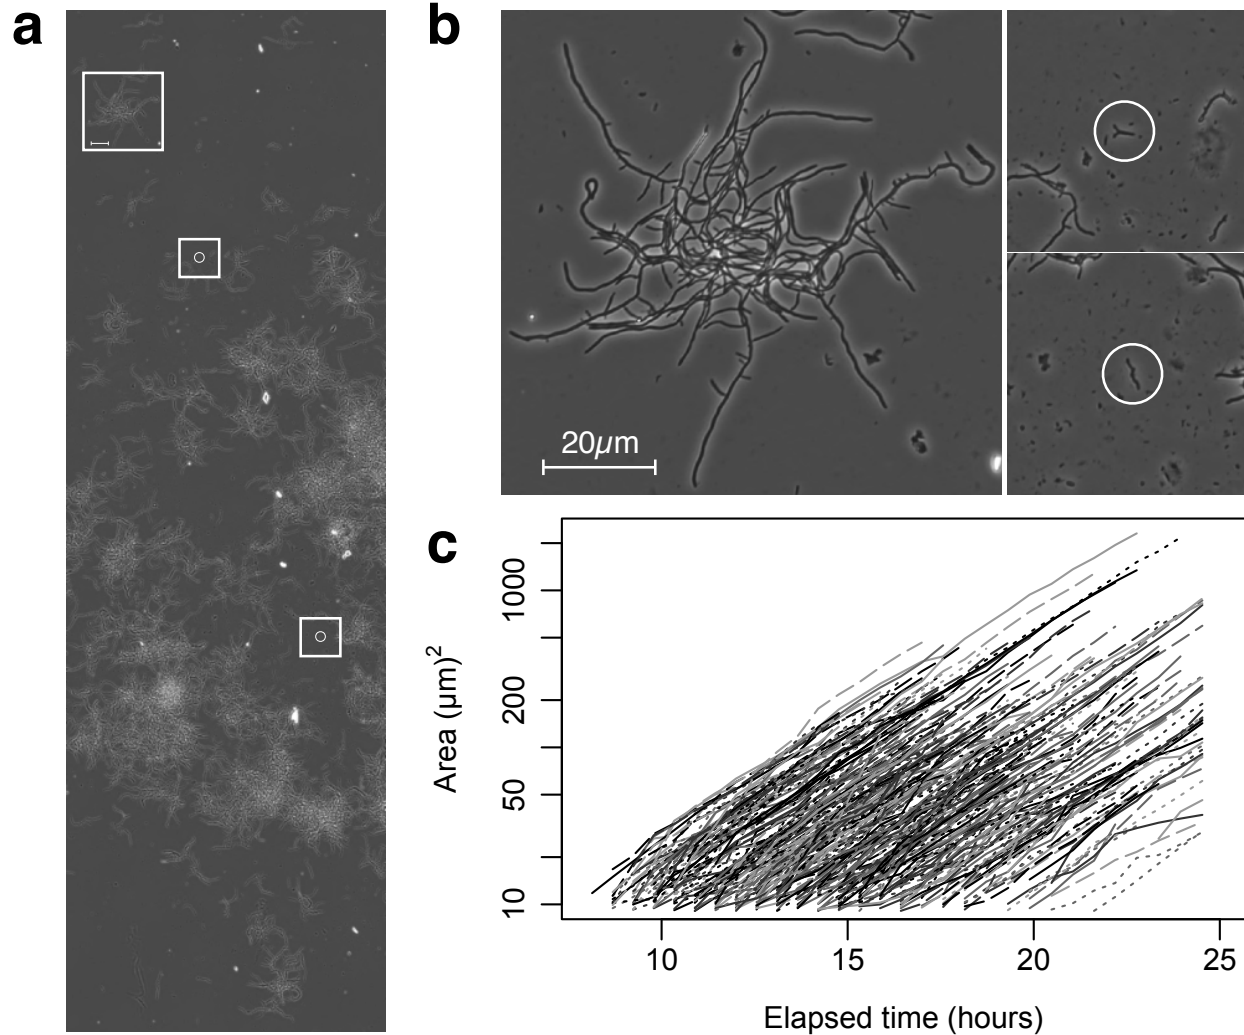

654

655 **Figure 3. Stochastic exits from germination largely explain the variability in the number of**  
656 **descendants. a**, A vertical cross-section representing one-fifth of a composite image of *S. S26F9*  
657 growth after 22.4 hours on solid medium with regions shown in (b) denoted by white boxes. **b**,  
658 Colonies originating from single spores can be drastically different in size at the same point in  
659 time. The image on the left shows the largest non-intersecting colony after 22.4 hours of  
660 growth. The two images on the right highlight the smallest identifiable colonies (circled) at the  
661 same time point and scale. The colony on the left has approximately 330 times more mycelial  
662 area than either of the colonies on the right. **c**, Growth curves for 301 colonies of *S. S26F9*  
663 tracked under the microscope. Each line represents the mycelial area of a colony originating  
664 from a single spore, and the lines are truncated when colonies intersect. Since mycelium  
665 thickness is approximately constant, this measure is proportional to the total length and



666 volume of the mycelium filaments. The largest colonies had a mycelia area almost 3-orders of  
667 magnitude greater than the smallest colonies at the end of the experiment.

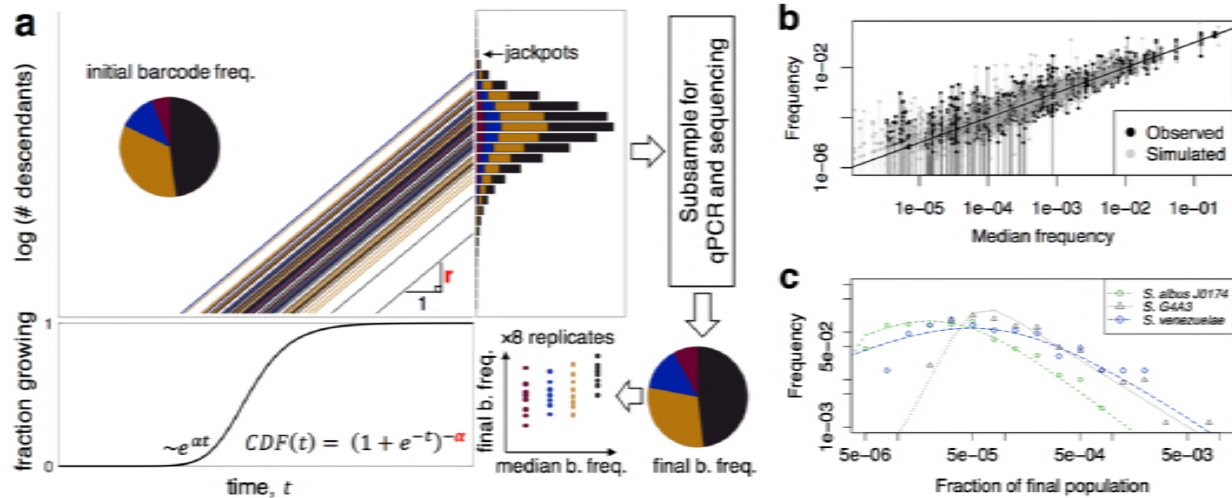

668

669 **Figure 4. Inferring the distribution of descendants from the entire dataset.** a, We performed  
670 simulations of the entire experiment with different distributions of descendants to test their  
671 ability to recapitulate the observed data (see Materials and Methods). b, The variation in  
672 relative barcode frequencies between 8 replicate populations is shown for the strain *S.*  
673 *coelicolor* at full initial concentration (black). Vertical lines connect the observed relative  
674 frequencies of each of the 8 biological replicates (points) corresponding to a given barcode, and  
675 extend to zero in cases where a barcode was not observed in one or more of the 8 replicates.  
676 Simulation results (gray) closely mirror the observed data. c, The optimal distributions of  
677 descendants obtained from parameter fitting (colored lines) generally matched the relative  
678 frequencies of singletons (points) for the three strains with the most singletons: *S. albus J1074*  
679 (400 singletons), *S. G4A3* (808), and *S. venezuelae* (64).

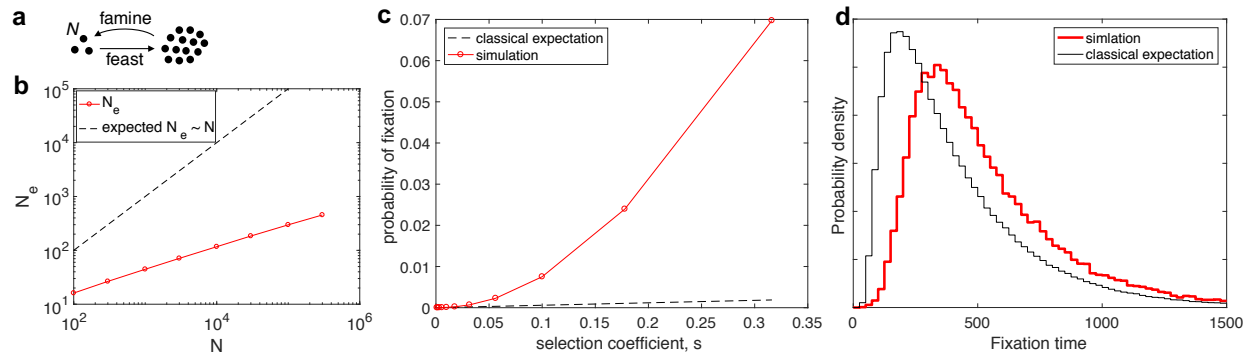

680

681 **Figure 5. Population genetics consequences of the experimentally determined distribution of**

682 **descendants. a**, In the model,  $N$  individuals exit dormancy stochastically and grow exponentially

683 at the same growth rate until a very large population size is reached.  $N$  individuals are then

684 randomly sampled to start the next cycle. **b**, Shown are the variance effective population sizes

685 ( $N_e$ ) that result from simulations with different numbers of initial cells ( $N$ ) (red circles connected

686 by lines). Strikingly,  $N_e$  does not scale linearly with  $N$  (black dashed line). Instead,  $N_e$  follows a

687 sub-linear power-law:  $N_e \sim N^\gamma$  with  $\gamma < 1$ . **c**, The probability of fixation is shown as a function of

688 the selection coefficient  $s$  (red,  $N = 100,000$ ,  $r = 0.2$ ,  $\alpha = 0.28$ ). The classical expectation based

689 on the formula presented in the text is shown for matching  $N$  and  $N_e$  (black dashed line). A log-

690 log presentation of this result (Fig. S9a) reveals that, for large  $s$ , the probability of fixation is a

691 super-linear power-law as a function of  $s$ . **d**, The probability of distribution for the fixation times

692 of a neutral allele with an initial fraction of 50% is shown. The model with the experimentally

693 determined heavy-tailed distribution of descendants is shown in red (same parameters as in b),

694 and the Fisher-Wright model with matching effective population size is shown in black.

695

696 SUPPLEMENTAL MATERIALS

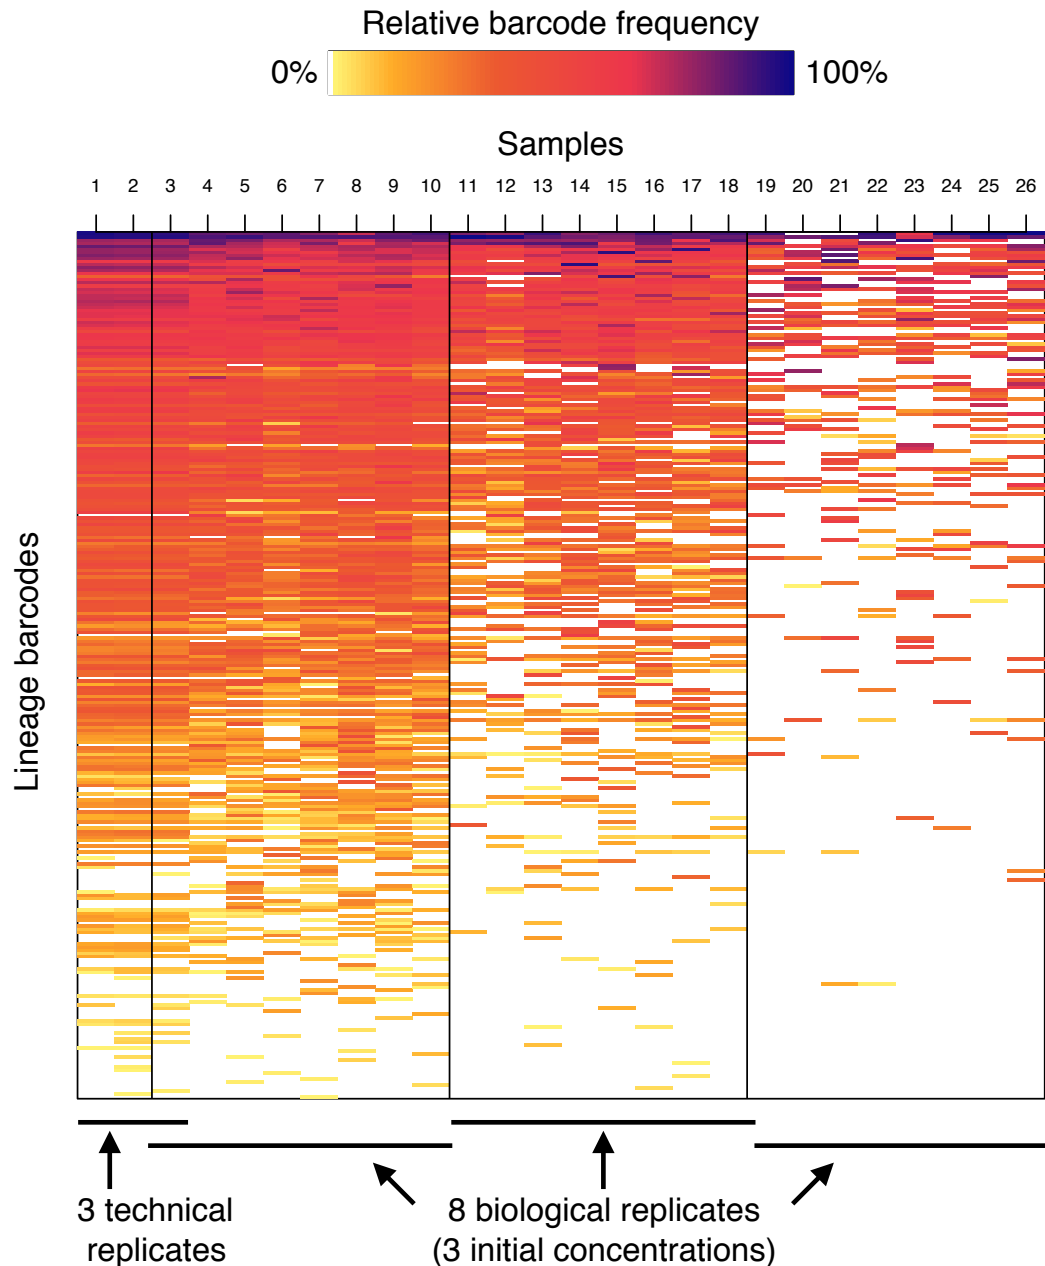

697  
698 **Figure S1. Example of the complete dataset collected for a single strain (*S. coelicolor*).** Each  
699 row depicts the relative fraction of a given barcode in a sample (column). Vertical lines separate  
700 each of the eight biological replicates starting from three different concentrations (separated  
701 by 10-fold increments). The leftmost three columns are technical (separate PCR and  
702 sequencing) replicates of the first sample.

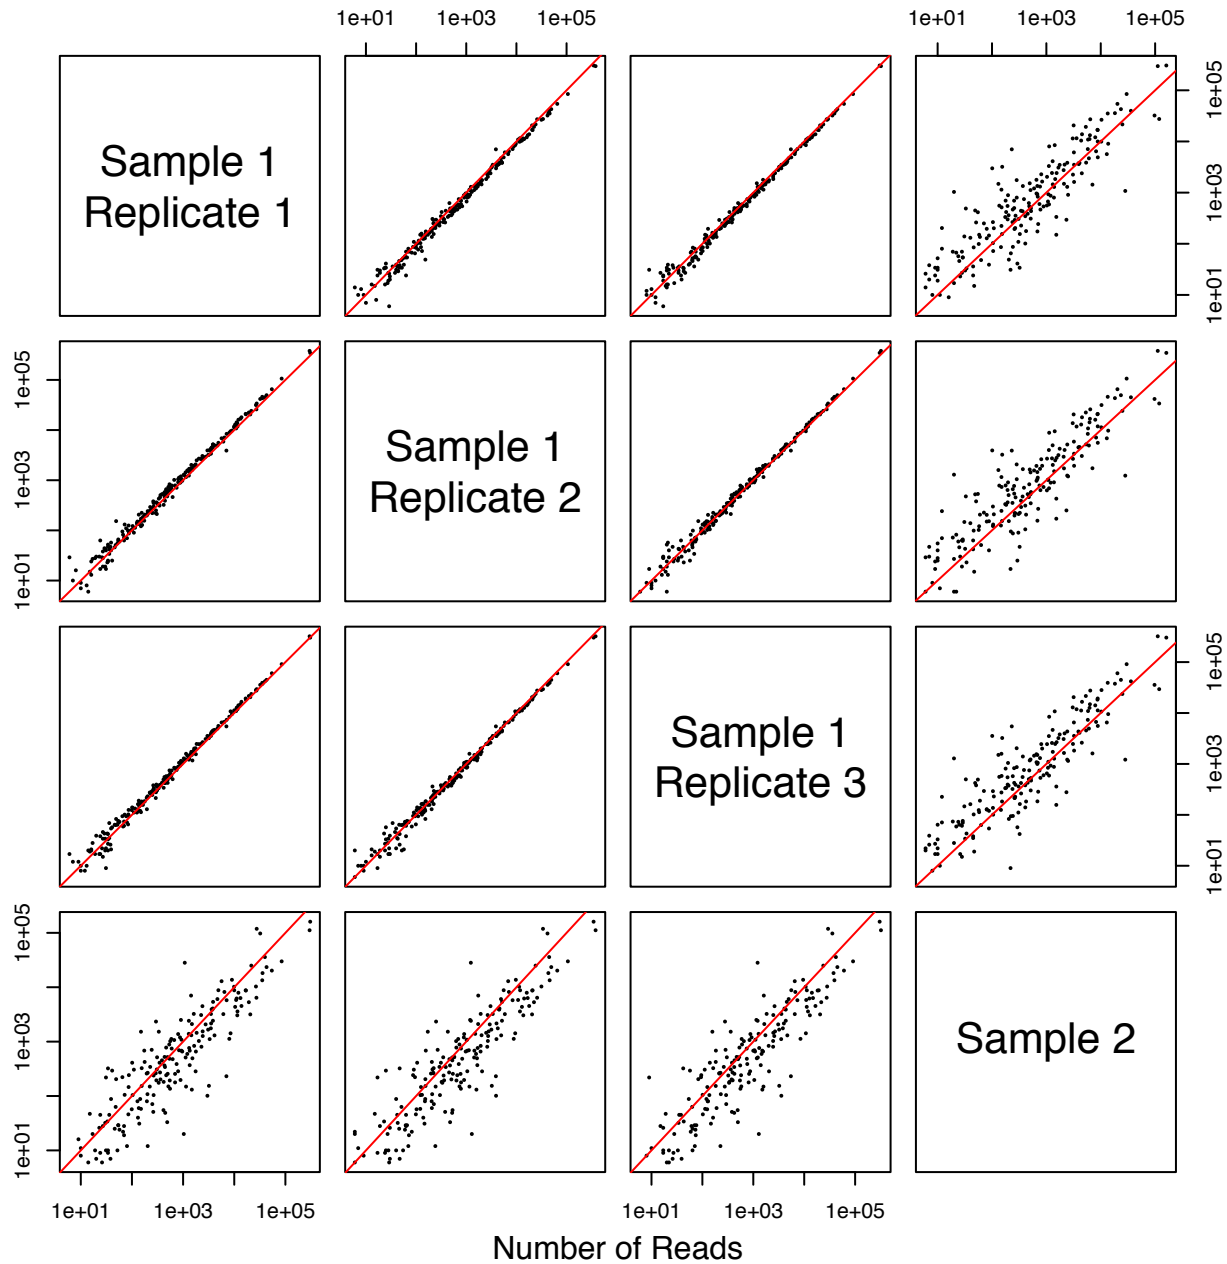

703  
704  
705  
706  
707  
708  
709

**Figure S2. Most of the variability between replicates is biological in nature.** Three technical (separate PCR and sequencing) replicates of the same biological sample are plotted against each other and a different biological sample of *S. coelicolor*. Each point corresponds to a unique barcode that was present in both samples. Correlation between technical replicates was much higher than that for biological replicates. The line of identity is colored red.

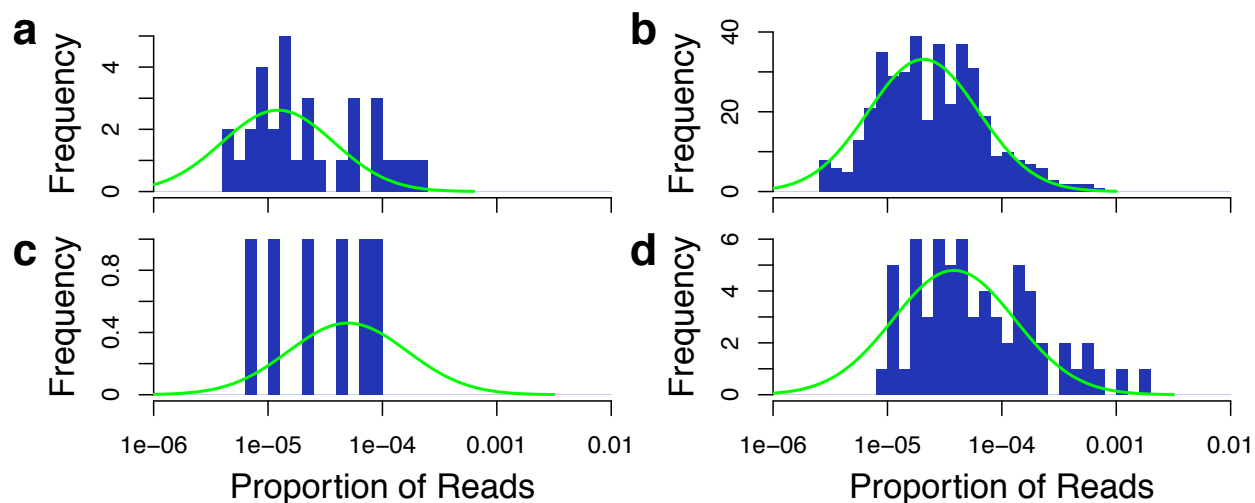

710  
711  
712  
713  
714  
715

**Figure S3. The distribution of singletons across strains was consistently heavy-tailed.** Four of five strains are shown: *S. coelicolor* (a), *S. albus J1074* (b), *S. S26F9* (c), and *S. venezuelae* (d). The green curve represents a log normal distribution fitted to the inner-quartile range of the data.

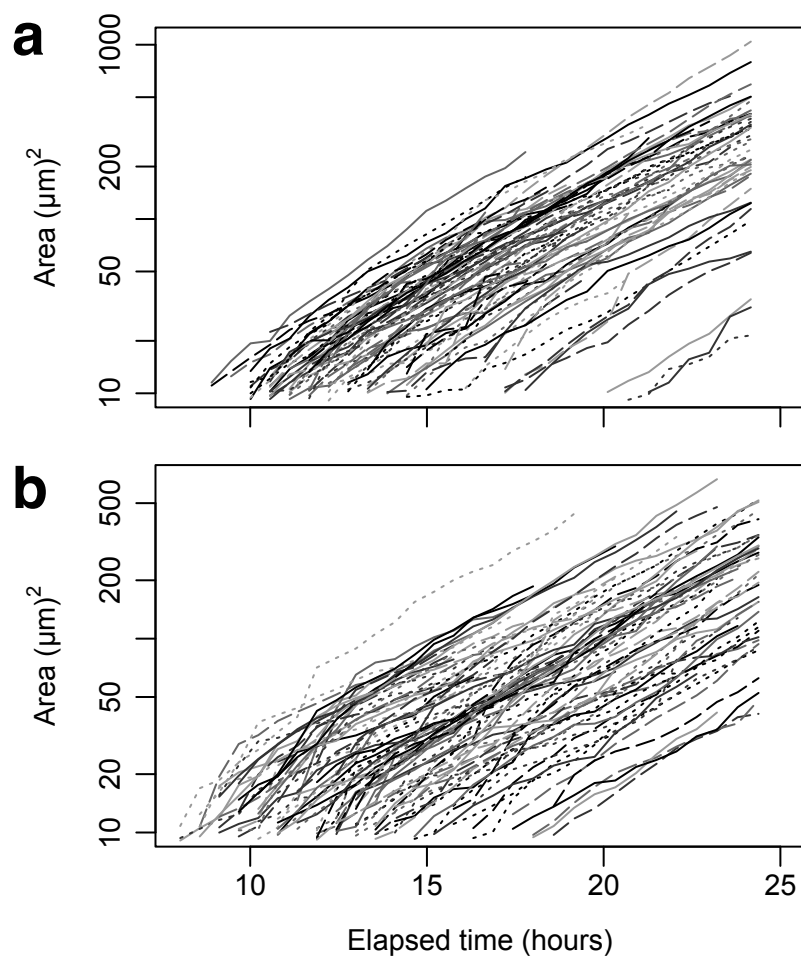

716

717 **Figure S4. Sets of growth curves for two additional strains.** Colony sizes over time are shown

718 for colonies of *S. coelicolor* (a) and *S. G4A3* (b) tracked under the microscope.

719

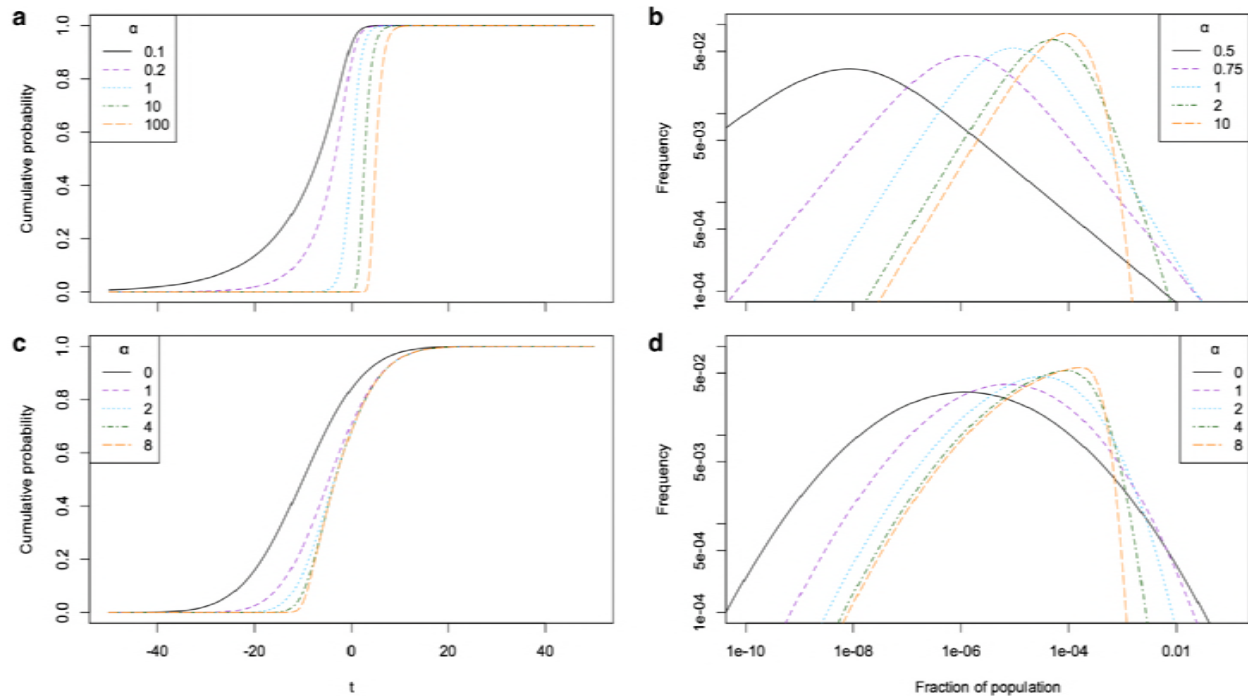

720  
721 **Figure S5. The effect of varying  $\alpha$  on the different distributions.** (a) The cumulative probability  
722 of germination as a function of lag time ( $CDF(t) = (1 + e^{-t})^{-\alpha}$ ; see main text), showing that  
723 higher values of  $\alpha$  result in fewer jackpots, whereas smaller values of  $\alpha$  result in more jackpots.  
724 (b) Corresponding distributions of descendants having the same rate ( $r = 1$ ) and mean ( $1/N =$   
725  $10^{-4}$ ), showing that  $\alpha$  controls the degree to which the distribution is heavy-tailed. (c) The  
726  $CDF(t)$  of the skew normal distribution, which is equivalent to the standard normal  
727 distribution when  $\alpha$  is 0 and becomes more skewed at higher values of  $\alpha$ . (d) In contrast to (b),  
728 the exponentiated skew normal distributions of descendants ( $r = 3$ ;  $1/N = 10^{-4}$ ) exhibit  
729 lognormal decay. Note that the right-tails in (d) are concave, while the right-tails in (b) are  
730 straight lines.



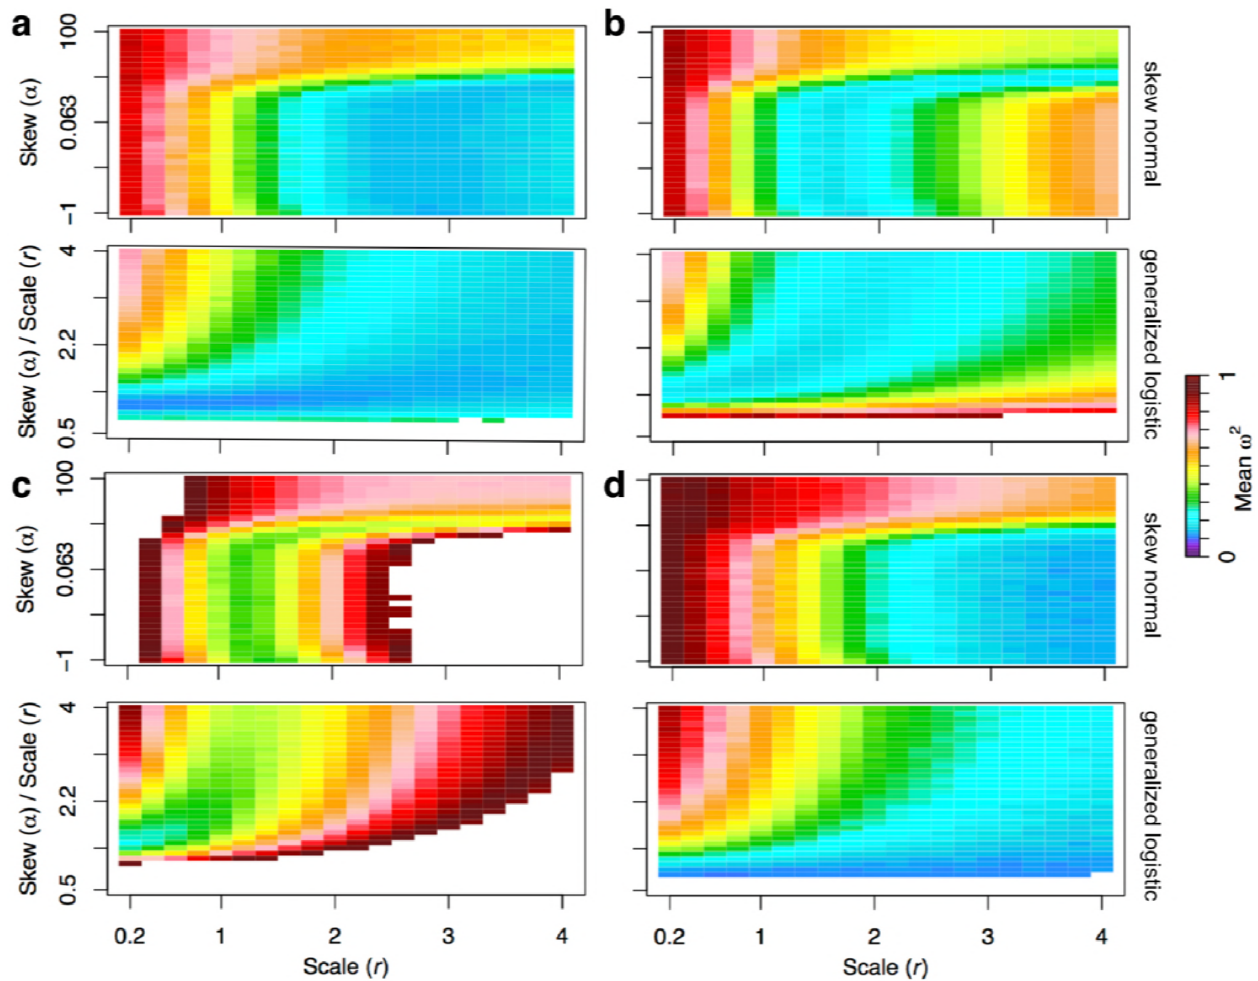

731  
732  
733  
734  
735  
736  
737  
738

**Figure S6. Effect of varying parameters ( $r$  and  $\alpha$ ) on simulation fits for four species at full initial concentration.** A grid search was performed to identify the optimal combination of parameters for each species. A skew normal (top) was compared to the generalized logistic function (bottom) for each species (a, *S. coelicolor*; b, *S. albus J1074*; c, *S. G4A3*; d, *S. S26F9*). The generalized logistic function largely achieved equivalent or better fits (lower mean  $\omega^2$ ) than the skew normal.

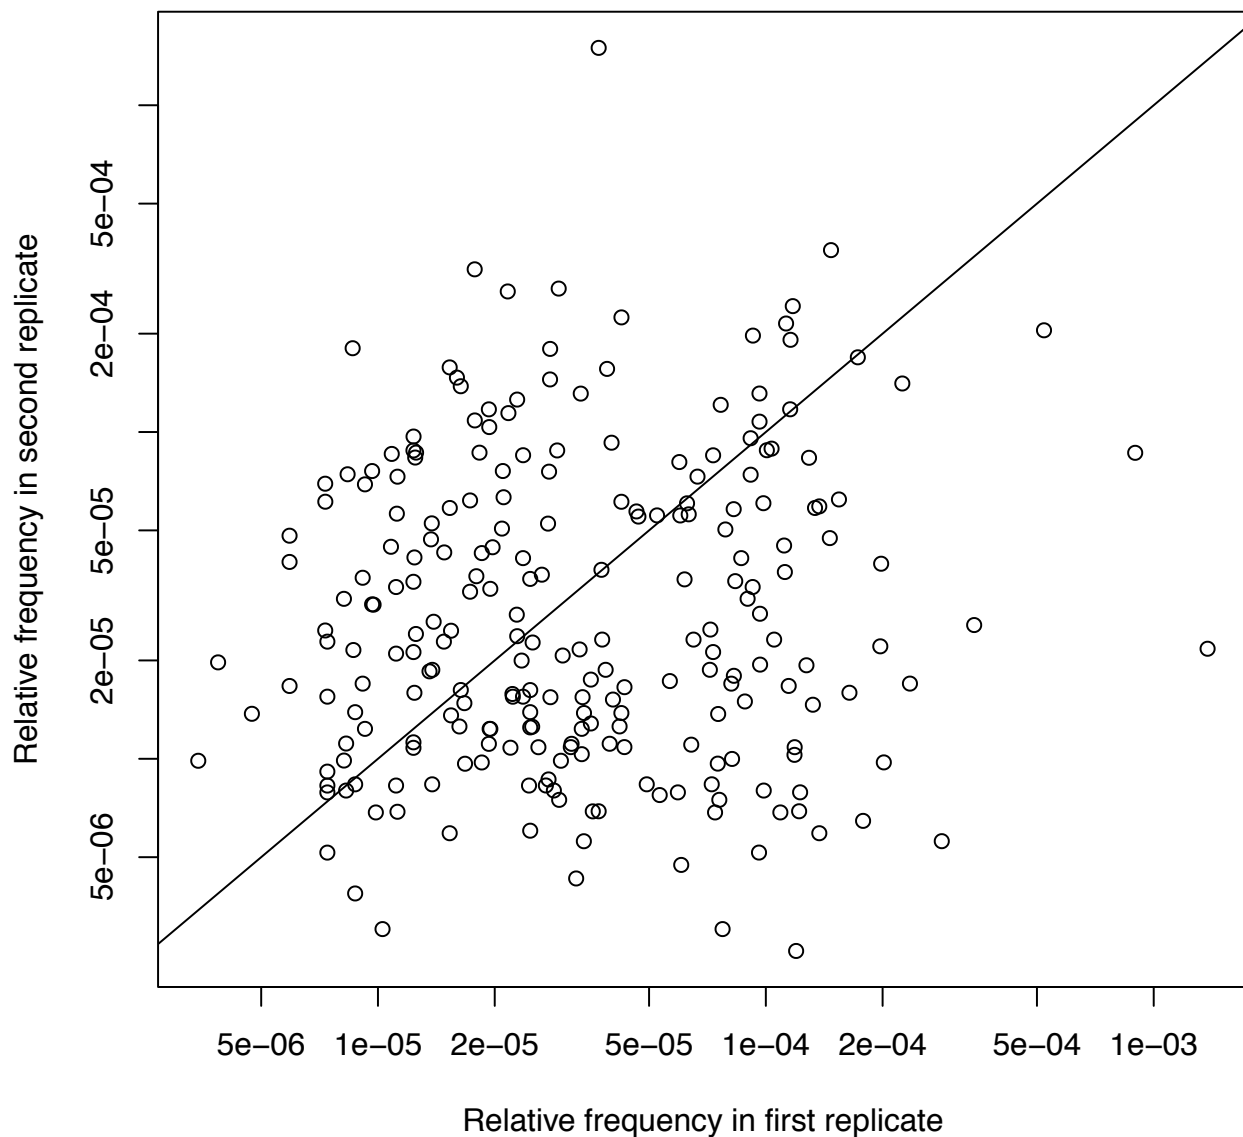

739  
740 **Figure S7. The frequency of rare barcodes was largely uncorrelated between biological**  
741 **replicates.** The relative frequencies of barcodes appearing in only 2 of 8 replicates are shown  
742 for strain *S. albus J1074*. The lack of correlation between replicate barcodes indicates that inter-  
743 barcode selection had a minimal influence over the variability between replicates. Note the log-  
744 scaled axes and the line of identity.  
745

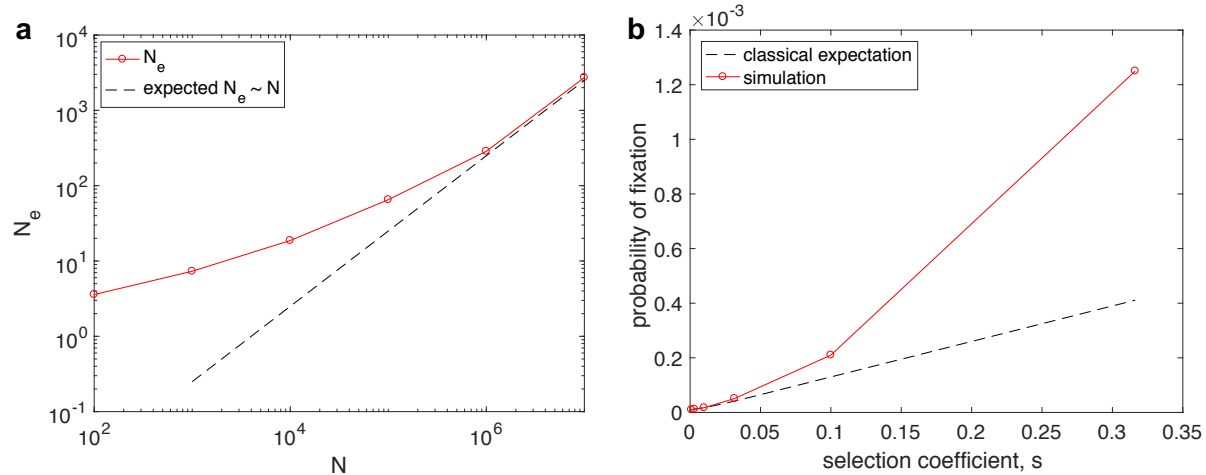

746  
747  
748  
749  
750  
751  
752  
753

**Figure S8. Effective population size and fixation probabilities for a lognormal-tailed distribution of descendants.** In both panels, a lognormal-tailed distribution of descendants resulted from using a standard normal distribution of lag-times ( $\alpha=0$ ) with  $r = 3$ . **(a)**  $N_e$  increases sub-linearly with  $N$ , but it asymptotically approaches  $N_e \sim N$  at large  $N$ . **(b)** The probability of fixation (red) is substantially higher than the classical expectation with matching  $N_e$  (dashed black).  $N=100,000$  for both panels.

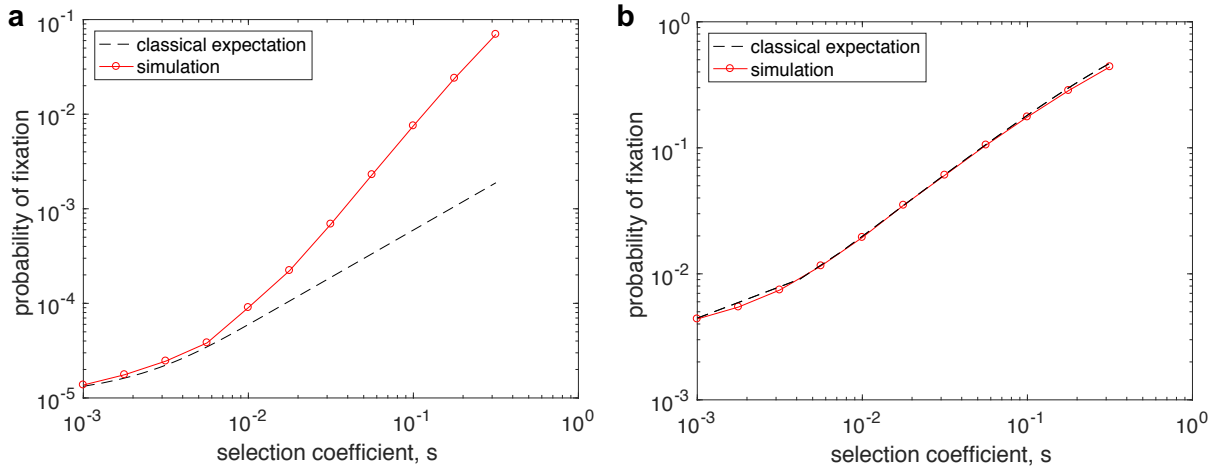

754  
755 **Figure S9. Fixation probabilities for beneficial mutations.** (a) The simulation results from Figure  
756 5c are replotted on a log-log plot. The simulated probability of fixation (red) approaches a  
757 straight line in log-log space for large selection coefficients, thus revealing a super-linear power-  
758 law dependence of the probability of fixation on the selection coefficient. In contrast, the  
759 classical expectation (dashed black) converges to a linear relationship. (b) Simulation of a  
760 Fisher-Wright model with the same effective population size as in panel (a). The probability of  
761 fixation (red) closely follows the theoretical prediction (dashed black) even for large values of  $s$ .  
762 The probabilities of fixation are very different in magnitude between panels (a) and (b) because  
763 the initial mutant fractions are  $1/N$  and  $1/N_e$ , respectively.
